# Supplementary material
Source: PubMed Central journal article supplement (PMC1716017)
Supplement: neo0811_0917SD1.pdf [file neo0811_0917SD1.pdf]

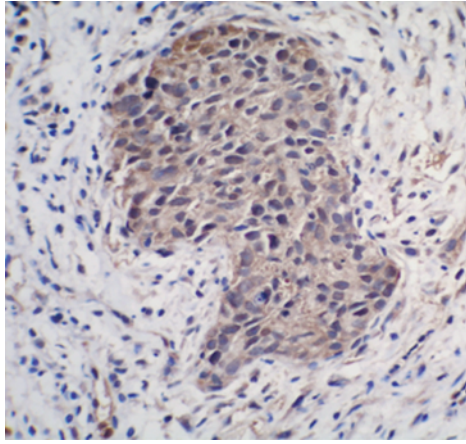

**A**

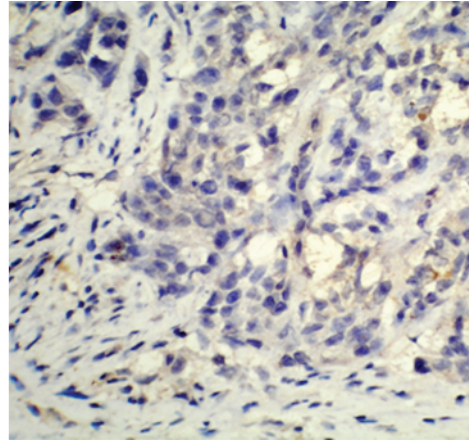

**B**

**Figure W1.** *Tiam1* expression in the orthotopic cecum of mouse, by immunohistochemical method. If positive signals were present, the cytoplasm stained brown. For negative controls, the antibody was replaced by PBS. The results showed that *Tiam1* was positive in Mock tumor (A) and was weak positive in *Tiam1KD/clone 2* tumor (B).
